# Supplementary material
Source: publisher figshare collection journal article supplement (https://sage.figshare.com/ndownloader/files/17771303)
Supplement: Supplementary file 1 [file 17771303]

### Supplementary Materials

Table S1

Standardized factor loadings and correlations of Rumination Reflection Questionnaire (RRQ) items across the United States and Singapore

| Item no. | RRQ item                                                                                           | RRQ scales |           |
|----------|----------------------------------------------------------------------------------------------------|------------|-----------|
|          |                                                                                                    | RUM        | REF       |
| 5        | I tend to "ruminate" or dwell over things that happen to me for a really long time afterward.      | .87 (.86)  |           |
| 7        | Often I'm playing back over in my mind how I acted in a past situation.                            | .83 (.77)  |           |
| 2        | I always seem to be rehashing in my mind recent things I've said or done.                          | .87 (.76)  |           |
| 4        | Long after an argument or disagreement is over with, my thoughts keep going back to what happened. | .80 (.64)  |           |
| 6R       | I don't waste time rethinking things that are over and done with.                                  | .47 (.40)  |           |
| 8        | I often find myself reevaluating something I've done.                                              | .83 (.66)  |           |
| 11       | I often reflect on episodes in my life that I should no longer concern myself with.                | .79 (.75)  |           |
| 12       | I spend a great deal of time thinking back over my embarrassing or disappointing moments.          | .75 (.80)  |           |
| 9R       | I never ruminate or dwell on myself for very long.                                                 | .43 (.46)  |           |
| 10R      | It is easy for me to put unwanted thoughts out of my mind.                                         | .51 (.40)  |           |
| 3        | Sometimes it is hard for me to shut off thoughts about myself.                                     | .82 (.71)  |           |
| 1        | My attention is often focused on aspects of myself I wish I'd stop thinking about.                 | .79 (.68)  |           |
| 15       | I love exploring my "inner" self.                                                                  |            | .73 (.77) |
| 23       | I often love to look at my life in philosophical ways.                                             |            | .75 (.73) |
| 22       | I love to meditate on the nature and meaning of things.                                            |            | .70 (.78) |
| 17R      | I don't really care for introspective or self-reflective thinking.                                 |            | .73 (.64) |
| 16       | My attitudes and feelings about things fascinate me.                                               |            | .73 (.72) |
| 18       | I love analyzing why I do things.                                                                  |            | .71 (.78) |
| 20R      | I don't care much for self-analysis.                                                               |            | .65 (.57) |
| 14R      | I'm not really a meditative type of person.                                                        |            | .57 (.40) |
| 13R      | Philosophical or abstract thinking doesn't appeal to me that much.                                 |            | .57 (.59) |
| 24R      | Contemplating myself isn't my idea of fun.                                                         |            | .67 (.59) |

|        |                                                              |       |           |
|--------|--------------------------------------------------------------|-------|-----------|
| 19     | People often say I'm a "deep," introspective type of person. |       | .73 (.75) |
| 21     | I'm very self-inquisitive by nature.                         |       | .69 (.64) |
|        | 1                                                            | 2     |           |
| 1. RUM | –                                                            | (.10) |           |
| 2. REF | .07                                                          | –     |           |

*Note.* R = reverse-coded items; RUM = rumination; REF = reflection; Values not in parentheses refer to the factor loadings of the United States sample, whereas values in parentheses are the factor loadings of the Singapore sample. \*  $p < .05$ ; \*\*  $p < .01$ ; \*\*\*  $p < .001$ .

Table S2

Standardized factor loadings and correlations of Perseverative Cognitions Questionnaire (PCQ)

items across the United States and Singapore

| Item no. | PCQ item                                                                                         | PCQ scales   |              |    |    |    |    |
|----------|--------------------------------------------------------------------------------------------------|--------------|--------------|----|----|----|----|
|          |                                                                                                  | LC           | PF           | EW | SC | DP | TD |
| 44       | It's hard for me to let a thought go once it enters my head.                                     | .87<br>(.82) |              |    |    |    |    |
| 30       | I find it difficult to dismiss a thought once it's entered my head.                              | .84<br>(.78) |              |    |    |    |    |
| 3        | I am consumed by certain thoughts.                                                               | .86<br>(.81) |              |    |    |    |    |
| 16       | I am surprised by how little control I have over certain thoughts.                               | .78<br>(.65) |              |    |    |    |    |
| 37       | It's difficult for me to get things done when my mind starts to race.                            | .68<br>(.68) |              |    |    |    |    |
| 8        | I repeatedly think about things to reduce the risk of danger.                                    |              | .70<br>(.88) |    |    |    |    |
| 36       | I repeatedly think about a task to avoid any problems that may arise.                            |              | .78<br>(.84) |    |    |    |    |
| 26       | I repeatedly think about a problem ahead of time to prevent misfortune from occurring.           |              | .72<br>(.74) |    |    |    |    |
| 9        | I repeatedly think about things so I can be prepared in case something bad happens.              |              | .87<br>(.80) |    |    |    |    |
| 24       | I repeatedly think about things to figure out how to avoid or prevent bad things from happening. |              | .92<br>(.88) |    |    |    |    |
| 41       | I repeatedly think about a current problem in order to avoid it.                                 |              | .93<br>(.89) |    |    |    |    |
| 18       | I explore all possible outcomes in my head in an effort to solve a problem.                      |              | .51<br>(.64) |    |    |    |    |

---

|    |                                                                                          |              |              |
|----|------------------------------------------------------------------------------------------|--------------|--------------|
| 27 | I usually find it likely that things will turn out poorly.                               | .91<br>(.90) |              |
| 21 | I usually expect the worst in ambiguous situations.                                      | .86<br>(.82) |              |
| 43 | I typically expect the worst to happen.                                                  | .91<br>(.84) |              |
| 17 | I believe good things are not likely to happen to me.                                    | .75<br>(.79) |              |
| 6  | I become absorbed in trying to understand my thoughts, feelings, and actions.            |              | .92<br>(.88) |
| 34 | I repeatedly think about my feelings to discover if they have some deeper meaning.       |              | .80<br>(.74) |
| 40 | I repeatedly think about my thoughts, feelings, and actions to better understand myself. |              | .72<br>(.70) |
| 12 | I often think about my moods to figure out why I feel the way I feel.                    |              | .70<br>(.77) |
| 23 | I repeatedly think about things that are over and done with.                             |              | .89<br>(.83) |
| 42 | I frequently focus my attention on things that I can no longer do anything about.        |              | .87<br>(.83) |
| 20 | I repeatedly play back past events in my mind.                                           |              | .87<br>(.85) |
| 19 | I repeatedly question the things I've done.                                              |              | .85<br>(.77) |
| 33 | I tend to replay in my mind how I acted in a past situation.                             |              | .86<br>(.80) |
| 38 | I often turn my mind to events in my past that I should no longer be concerned about.    |              | .83<br>(.82) |
| 32 | Things that have happened to me unwillingly linger in my mind.                           |              | .87<br>(.91) |
| 35 | After a problem has long been resolved, my thoughts drift back to what happened.         |              | .87<br>(.75) |
| 7  | I can't help but rehash past events in my mind.                                          |              | .90<br>(.81) |
| 1  | After I do something I cannot stop wondering if I made a mistake.                        |              | .78<br>(.77) |

---

|    |                                                                                            |              |              |
|----|--------------------------------------------------------------------------------------------|--------------|--------------|
| 13 | I often find myself repeatedly thinking about recent events, wishing they had gone better. | .83<br>(.77) |              |
| 31 | I cannot get thoughts about recent occurrences out of my head.                             | .87<br>(.86) |              |
| 2  | Situations that have happened often drift back into my mind.                               | .74<br>(.67) |              |
| 22 | My attention is always focused on how I acted in past situations.                          | .82<br>(.76) |              |
| 25 | My thoughts are shameful.                                                                  |              | .83<br>(.74) |
| 11 | It is sometimes as if my thoughts are not my own.                                          |              | .80<br>(.86) |
| 45 | I am a terrible person for having weird or gross thoughts.                                 |              | .72<br>(.78) |
| 5  | I am a bad person for thinking the way I do.                                               |              | .75<br>(.71) |
| 39 | I am losing control when I have bad thoughts.                                              |              | .69<br>(.80) |
| 15 | My thoughts make me uncomfortable.                                                         |              | .95<br>(.88) |
| 28 | I believe that having a bad thought is the same as committing a bad act.                   |              | .41<br>(.55) |
| 4  | I feel appalled by some of my thoughts.                                                    |              | .77<br>(.74) |
| 14 | I am afraid of having inappropriate thoughts.                                              |              | .70<br>(.63) |
| 10 | I can cause bad things to happen if I think about them happening.                          |              | .64<br>(.65) |
| 29 | Some of my thoughts leave me frozen in place.                                              |              | .84<br>(.67) |

|       | 1                  | 2                     | 3                     | 4                     | 5                     | 6                     |
|-------|--------------------|-----------------------|-----------------------|-----------------------|-----------------------|-----------------------|
| 1. LC | –                  | (.43 <sup>***</sup> ) | (.55 <sup>***</sup> ) | (.52 <sup>***</sup> ) | (.69 <sup>***</sup> ) | (.67 <sup>***</sup> ) |
| 2. PF | .44 <sup>***</sup> | –                     | (.42 <sup>***</sup> ) | (.47 <sup>***</sup> ) | (.61 <sup>***</sup> ) | (.17)                 |
| 3. EW | .57 <sup>***</sup> | .47 <sup>***</sup>    | –                     | (.38 <sup>***</sup> ) | (.71 <sup>***</sup> ) | (.53 <sup>***</sup> ) |
| 4. SC | .64 <sup>***</sup> | .53 <sup>***</sup>    | .51 <sup>***</sup>    | –                     | (.53 <sup>***</sup> ) | (.35 <sup>***</sup> ) |
| 5. DP | .78 <sup>***</sup> | .51 <sup>***</sup>    | .67 <sup>***</sup>    | .72 <sup>***</sup>    | –                     | (.48 <sup>***</sup> ) |
| 6. TD | .46 <sup>***</sup> | .11                   | .52 <sup>***</sup>    | .40 <sup>***</sup>    | .44 <sup>***</sup>    | –                     |

*Note.* LC = lack of controllability; PF = preparing for the future; EW = expecting the worst; SC = searching for causes and meanings; DP = dwelling on the past; TD = thoughts discrepant with the ideal self; Values not in parentheses refer to the factor loadings or correlations of the United

States sample, whereas values in parentheses are the factor loadings or correlations of the Singapore sample. \*  $p < .05$ ; \*\*  $p < .01$ ; \*\*\*  $p < .001$ .

Table S3

Standardized factor loadings and correlations of Intolerance of Uncertainty Scale (IUS) items across the United States and Singapore

| Item no. | IUS item                                                                   | IUS scales |           |
|----------|----------------------------------------------------------------------------|------------|-----------|
|          |                                                                            | SELF       | UNFAIR    |
| 12       | When it's time to act, uncertainty paralyzes me.                           | .79 (.73)  |           |
| 14       | When I am uncertain, I can't go forward.                                   | .74 (.80)  |           |
| 22       | Being uncertain means that I lack confidence.                              | .72 (.62)  |           |
| 15       | When I am uncertain, I can't function very well.                           | .78 (.74)  |           |
| 13       | Being uncertain means that I am not first rate.                            | .78 (.71)  |           |
| 1        | Uncertainty stops me from having a strong opinion.                         | .44 (.52)  |           |
| 16       | Unlike me, others seem to know where they are going with their lives.      | .62 (.48)  |           |
| 17       | Uncertainty makes me vulnerable, unhappy, or sad.                          | .83 (.79)  |           |
| 2        | Being uncertain means that a person is disorganized.                       | .51 (.52)  |           |
| 20       | The smallest doubt can stop me from acting.                                | .76 (.71)  |           |
| 25       | I must get away from all uncertain situations.                             | .77 (.69)  |           |
| 9        | Uncertainty keeps me from living a full life.                              | .79 (.75)  |           |
| 24       | Uncertainty keeps me from sleeping soundly.                                | .74 (.56)  |           |
| 23       | I think it's unfair that other people seem to be sure about their future.  | .62 (.55)  |           |
| 3        | Uncertainty makes life intolerable.                                        | .65 (.77)  |           |
| 10       | One should always look ahead so as to avoid surprises.                     |            | .65 (.52) |
| 18       | I always want to know what the future has in store for me.                 |            | .68 (.60) |
| 5        | My mind can't be relaxed if I don't know what will happen tomorrow.        |            | .79 (.71) |
| 19       | I can't stand being taken by surprise.                                     |            | .63 (.69) |
| 21       | I should be able to organize everything in advance.                        |            | .68 (.67) |
| 8        | It frustrates me not having all the information I need.                    |            | .70 (.73) |
| 7        | Unforeseen events upset me greatly.                                        |            | .78 (.80) |
| 11       | A small unforeseen event can spoil everything even with the best planning. |            | .72 (.55) |
| 4        | It's unfair having no guarantees in life.                                  |            | .67 (.66) |
| 6        | Uncertainty makes me uneasy, anxious, or stressed.                         |            | .80 (.81) |
| 26       | The ambiguities in life stress me.                                         |            | .83 (.83) |
| 27       | I can't stand being undecided about my future.                             |            | .73 (.71) |

---

|           | 1                  | 2                     |
|-----------|--------------------|-----------------------|
| 1. SELF   | –                  | (.89 <sup>***</sup> ) |
| 2. UNFAIR | .92 <sup>***</sup> | –                     |

---

*Note.* SELF = uncertainty has negative behavioral and self-referent implications; UNFAIR = uncertainty is unfair and spoils everything; Values not in parentheses refer to the factor loadings or correlations of the United States sample, whereas values in parentheses are the factor loadings or correlations of the Singapore sample. \*  $p < .05$ ; \*\*  $p < .01$ ; \*\*\*  $p < .001$ .

Table S4

Standardized factor loadings and correlations of Anxiety Sensitivity Index–3 (ASI-3) across the US and Singapore

| Item no. | ASI-3 item                                                                                       | ASI-3 Scales |              |              |
|----------|--------------------------------------------------------------------------------------------------|--------------|--------------|--------------|
|          |                                                                                                  | PHY          | COG          | SOC          |
| 3        | It scares me when my heart beats rapidly.                                                        | .82 (.78)    |              |              |
| 4        | When my stomach is upset, I worry that I might be seriously ill.                                 | .70 (.65)    |              |              |
| 7        | When my chest feels tight, I get scared that I won't be able to breathe properly.                | .78 (.79)    |              |              |
| 8        | When I feel pain in my chest, I worry that I'm going to have a heart attack.                     | .76 (.81)    |              |              |
| 12       | When I notice my heart skipping a beat, I worry that there is something seriously wrong with me. | .81 (.87)    |              |              |
| 15       | When my throat feels tight, I worry that I could choke to death.                                 | .70 (.75)    |              |              |
| 2        | When I cannot keep my mind on a task, I worry that I might be going crazy.                       |              | .71<br>(.79) |              |
| 5        | It scares me when I am unable to keep my mind on a task.                                         |              | .71<br>(.78) |              |
| 10       | When I feel "spacey" or spaced out I worry that I may be mentally ill.                           |              | .81<br>(.76) |              |
| 14       | When my thoughts seem to speed up, I worry that I might be going crazy.                          |              | .85<br>(.80) |              |
| 16       | When I have trouble thinking clearly, I worry that there is something wrong with me.             |              | .82<br>(.78) |              |
| 18       | When my mind goes blank, I worry there is something terribly wrong with me.                      |              | .74<br>(.78) |              |
| 1        | It is important for me not to appear nervous.                                                    |              |              | .52<br>(.57) |
| 6        | When I tremble in the presence of others, I fear what people might think of me.                  |              |              | .67<br>(.84) |
| 9        | I worry that other people will notice my anxiety.                                                |              |              | .81<br>(.81) |
| 11       | It scares me when I blush in front of people.                                                    |              |              | .65<br>(.62) |
| 13       | When I begin to sweat in a social situation, I fear people will think negatively of me.          |              |              | .76<br>(.73) |
| 17       | I think it would be horrible for me to faint in public.                                          |              |              | .60<br>(.64) |

---

|        | 1                  | 2                     | 3                     |
|--------|--------------------|-----------------------|-----------------------|
| 1. PHY | –                  | (.81 <sup>***</sup> ) | (.66 <sup>***</sup> ) |
| 2. COG | .85 <sup>***</sup> | –                     | (.70 <sup>***</sup> ) |
| 3. SOC | .78 <sup>**</sup>  | .83 <sup>***</sup>    | –                     |

---

*Note.* PHY = physical concerns; COG = cognitive concerns; SOC = social concerns; Values not in parentheses refer to the factor loadings or correlations of the United States sample, whereas values in parentheses are the factor loadings or correlations of the Singapore sample. \*  $p < .05$ ; \*\*  $p < .01$ ; \*\*\*  $p < .001$ .

Table S5

*Standardized factor loadings and correlations of Cognitive and Behavioral Processes*

*Questionnaire (CBPQ) items across the United States and Singapore*

| Item no. | CBPQ item                                                                                                                                               | CBPQ scales  |              |
|----------|---------------------------------------------------------------------------------------------------------------------------------------------------------|--------------|--------------|
|          |                                                                                                                                                         | Factor A     | Factor B     |
| A1       | How much have you focused on your internal experiences when feeling bad, rather than focusing on what is happening in your surroundings?                | .56<br>(.45) |              |
| A2       | How much have you tried to mentally avoid or get rid of unpleasant internal experiences, rather than just noticing them and letting them pass?          | .66<br>(.46) |              |
| A3       | How much have you tried to change or mentally control your internal experiences when feeling bad, rather than just noticing them and letting them pass? | .58<br>(.52) |              |
| A4       | How much have you gone over and over past experiences when feeling bad, rather than doing the things that are important to you?                         | .80<br>(.73) |              |
| A5       | How much have you worried about bad things that might happen in the future, rather than doing the things that are important to you?                     | .71<br>(.81) |              |
| A6       | How much have you judged yourself or your appearance to other people when feeling bad, rather than just noticing people around you?                     | .69<br>(.58) |              |
| A7       | How much have you let your internal experiences rather than what you see and hear in the moment, guide what you do?                                     | .70<br>(.54) |              |
| A8       | How much have you analyzed past events for answers when feeling bad, rather than doing the things that are important to you?                            | .77<br>(.74) |              |
| B1       | How much have you looked for possible harm or threats in your surroundings when feeling bad, rather than just noticing things around you?               |              | .53<br>(.47) |
| B2       | How much have you looked for things in your surroundings to make you feel safe when feeling bad, rather than just noticing things around you?           |              | .54<br>(.55) |
| B3       | How much have you avoided dealing with an actual problem when feeling bad, rather than doing something to solve the problem?                            |              | .68<br>(.61) |
| B4       | How much have you distracted yourself from feeling bad by doing an activity too often, rather than doing the things that are important to you?          |              | .75<br>(.68) |

|    |                                                                                                                                                      |               |
|----|------------------------------------------------------------------------------------------------------------------------------------------------------|---------------|
| B5 | How much have you been inactive or avoided situations, activities or people when feeling bad rather than doing the things that are important to you? | .75<br>(.74)  |
| B6 | How much have you done something negative to stop yourself feeling bad, rather than just experienced feeling bad?                                    | .21<br>(.051) |
| B7 | How much have you used alcohol, drugs, food or an activity to reduce or prevent unpleasant internal experiences, rather than just “be with them”?    | .59<br>(.40)  |

---

|             | 1      | 2      |
|-------------|--------|--------|
| 1. Factor A | –      | (.66*) |
| 2. Factor B | .83*** | –      |

---

*Note.* Values not in parentheses refer to the factor loadings or correlations of the United States sample, whereas values in parentheses are the factor loadings or correlations of the Singapore sample. \*  $p < .05$ ; \*\*  $p < .01$ ; \*\*\*  $p < .001$ .

Table S6

*Standardized factor loadings and correlations of Rumination Reflection Questionnaire (RRQ) items across gender.*

| Item no. | RRQ item                                                                                           | RRQ scales |           |
|----------|----------------------------------------------------------------------------------------------------|------------|-----------|
|          |                                                                                                    | RUM        | REF       |
| 5        | I tend to "ruminate" or dwell over things that happen to me for a really long time afterward.      | .86 (.87)  |           |
| 7        | Often I'm playing back over in my mind how I acted in a past situation.                            | .76 (.84)  |           |
| 2        | I always seem to be rehashing in my mind recent things I've said or done.                          | .80 (.86)  |           |
| 4        | Long after an argument or disagreement is over with, my thoughts keep going back to what happened. | .80 (.76)  |           |
| 6R       | I don't waste time rethinking things that are over and done with.                                  | .46 (.54)  |           |
| 8        | I often find myself reevaluating something I've done.                                              | .79 (.82)  |           |
| 11       | I often reflect on episodes in my life that I should no longer concern myself with.                | .74 (.78)  |           |
| 12       | I spend a great deal of time thinking back over my embarrassing or disappointing moments.          | .75 (.77)  |           |
| 9R       | I never ruminate or dwell on myself for very long.                                                 | .50 (.50)  |           |
| 10R      | It is easy for me to put unwanted thoughts out of my mind.                                         | .48 (.53)  |           |
| 3        | Sometimes it is hard for me to shut off thoughts about myself.                                     | .80 (.80)  |           |
| 1        | My attention is often focused on aspects of myself I wish I'd stop thinking about.                 | .77 (.77)  |           |
| 15       | I love exploring my "inner" self.                                                                  |            | .79 (.73) |
| 23       | I often love to look at my life in philosophical ways.                                             |            | .77 (.75) |
| 22       | I love to meditate on the nature and meaning of things.                                            |            | .76 (.73) |
| 17R      | I don't really care for introspective or self-reflective thinking.                                 |            | .86 (.67) |
| 16       | My attitudes and feelings about things fascinate me.                                               |            | .72 (.75) |
| 18       | I love analyzing why I do things.                                                                  |            | .76 (.76) |
| 20R      | I don't care much for self-analysis.                                                               |            | .66 (.63) |
| 14R      | I'm not really a meditative type of person.                                                        |            | .51 (.50) |
| 13R      | Philosophical or abstract thinking doesn't appeal to me that much.                                 |            | .63 (.53) |
| 24R      | Contemplating myself isn't my idea of fun.                                                         |            | .74 (.63) |
| 19       | People often say I'm a "deep," introspective type of person.                                       |            | .73 (.76) |

| 21     | I'm very self-inquisitive by nature. |       | .70 (.70) |
|--------|--------------------------------------|-------|-----------|
|        | 1                                    | 2     |           |
| 1. RUM | –                                    | (.11) |           |
| 2. REF | .19                                  | –     |           |

*Note.* R = reverse-coded items; RUM = rumination; REF = reflection; Values not in parentheses refer to the factor loadings or correlations of males, whereas values in parentheses are the factor loadings or correlations of females. \*  $p < .05$ ; \*\*  $p < .01$ ; \*\*\*  $p < .001$ .

Table S7

Standardized factor loadings and correlations of Perseverative Cognitions Questionnaire (PCQ)

items across gender

| Item no. | PCQ item                                                                                        | PCQ scales   |              |    |    |    |    |
|----------|-------------------------------------------------------------------------------------------------|--------------|--------------|----|----|----|----|
|          |                                                                                                 | LC           | PF           | EW | SC | DP | DT |
| 44       | It's hard for me to let a thought go once it enters my head                                     | .91<br>(.83) |              |    |    |    |    |
| 30       | I find it difficult to dismiss a thought once it's entered my head                              | .82<br>(.82) |              |    |    |    |    |
| 3        | I am consumed by certain thoughts                                                               | .83<br>(.86) |              |    |    |    |    |
| 16       | I am surprised by how little control I have over certain thoughts                               | .76<br>(.78) |              |    |    |    |    |
| 37       | It's difficult for me to get things done when my mind starts to race                            | .70<br>(.68) |              |    |    |    |    |
| 8        | I repeatedly think about things to reduce the risk of danger                                    |              | .84<br>(.75) |    |    |    |    |
| 36       | I repeatedly think about a task to avoid any problems that may arise                            |              | .78<br>(.79) |    |    |    |    |
| 26       | I repeatedly think about a problem ahead of time to prevent misfortune from occurring           |              | .67<br>(.72) |    |    |    |    |
| 9        | I repeatedly think about things so I can be prepared in case something bad happens              |              | .88<br>(.86) |    |    |    |    |
| 24       | I repeatedly think about things to figure out how to avoid or prevent bad things from happening |              | .91<br>(.92) |    |    |    |    |
| 41       | I repeatedly think about a current problem in order to avoid it                                 |              | .97<br>(.93) |    |    |    |    |

---

|    |                                                                                         |              |              |
|----|-----------------------------------------------------------------------------------------|--------------|--------------|
| 18 | I explore all possible outcomes in my head in an effort to solve a problem              | .41<br>(.55) |              |
| 27 | I usually find it likely that things will turn out poorly                               | .92<br>(.55) |              |
| 21 | I usually expect the worst in ambiguous situations                                      | .86<br>(.87) |              |
| 43 | I typically expect the worst to happen                                                  | .97<br>(.86) |              |
| 17 | I believe good things are not likely to happen to me                                    | .78<br>(.78) |              |
| 6  | I become absorbed in trying to understand my thoughts, feelings, and actions            |              | .79<br>(.95) |
| 34 | I repeatedly think about my feelings to discover if they have some deeper meaning       |              | .81<br>(.79) |
| 40 | I repeatedly think about my thoughts, feelings, and actions to better understand myself |              | .79<br>(.71) |
| 12 | I often think about my moods to figure out why I feel the way I feel                    |              | .77<br>(.72) |
| 23 | I repeatedly think about things that are over and done with                             |              | .81<br>(.88) |
| 42 | I frequently focus my attention on things that I can no longer do anything about        |              | .81<br>(.86) |
| 20 | I repeatedly play back past events in my mind                                           |              | .89<br>(.85) |
| 19 | I repeatedly question the things I've done                                              |              | .79<br>(.86) |
| 33 | I tend to replay in my mind how I acted in a past situation                             |              | .90<br>(.83) |
| 38 | I often turn my mind to events in my past that I should no longer be concerned about    |              | .83<br>(.82) |
| 32 | Things that have happened to me unwillingly linger in my mind                           |              | .92<br>(.89) |

---

---

|    |                                                                                                    |              |
|----|----------------------------------------------------------------------------------------------------|--------------|
| 35 | After a problem has long<br>been resolved, my thoughts<br>drift back to what happened              | .82<br>(.85) |
| 7  | I can't help but rehash past<br>events in my mind                                                  | .85<br>(.88) |
| 1  | After I do something I<br>cannot stop wondering if I<br>made a mistake                             | .82<br>(.77) |
| 13 | I often find myself<br>repeatedly thinking about<br>recent events, wishing they<br>had gone better | .83<br>(.80) |
| 31 | I cannot get thoughts about<br>recent occurrences out of my<br>head                                | .85<br>(.88) |
| 2  | Situations that have<br>happened often drift back<br>into my mind                                  | .69<br>(.74) |
| 22 | My attention is always<br>focused on how I acted in<br>past situations                             | .79<br>(.83) |
| 25 | My thoughts are shameful                                                                           | .79<br>(.82) |
| 11 | It is sometimes as if my<br>thoughts are not my own                                                | .88<br>(.82) |
| 45 | I am a terrible person for<br>having weird or gross<br>thoughts                                    | .64<br>(.80) |
| 5  | I am a bad person for<br>thinking the way I do                                                     | .65<br>(.80) |
| 39 | I am losing control when I<br>have bad thoughts                                                    | .74<br>(.74) |
| 15 | My thoughts make me<br>uncomfortable                                                               | .91<br>(.92) |
| 28 | I believe that having a bad<br>thought is the same as<br>committing a bad act                      | .53<br>(.52) |
| 4  | I feel appalled by some of<br>my thoughts                                                          | .80<br>(.81) |
| 14 | I am afraid of having<br>inappropriate thoughts                                                    | .65<br>(.75) |
| 10 | I can cause bad things to<br>happen if I think about them<br>happening                             | .72<br>(.67) |
| 29 | Some of my thoughts leave<br>me frozen in place                                                    | .81<br>(.80) |

---

---

|       | 1                  | 2                      | 3                     | 4                     | 5                     | 6                     |
|-------|--------------------|------------------------|-----------------------|-----------------------|-----------------------|-----------------------|
| 1. LC | –                  | (.485 <sup>***</sup> ) | (.60 <sup>***</sup> ) | (.63 <sup>***</sup> ) | (.76 <sup>***</sup> ) | (.56 <sup>***</sup> ) |
| 2. PF | .43 <sup>***</sup> | –                      | (.48 <sup>***</sup> ) | (.49 <sup>***</sup> ) | (.55 <sup>***</sup> ) | (.19)                 |
| 3. EW | .62 <sup>***</sup> | .52 <sup>***</sup>     | –                     | (.48 <sup>***</sup> ) | (.67 <sup>***</sup> ) | (.58 <sup>***</sup> ) |
| 4. SC | .64 <sup>***</sup> | .74 <sup>***</sup>     | .63 <sup>***</sup>    | –                     | (.66 <sup>***</sup> ) | (.43 <sup>***</sup> ) |
| 5. DP | .78 <sup>***</sup> | .55 <sup>***</sup>     | .77 <sup>***</sup>    | .74 <sup>***</sup>    | –                     | (.46 <sup>***</sup> ) |
| 6. DT | .59 <sup>***</sup> | .20                    | .55 <sup>***</sup>    | .49 <sup>***</sup>    | .50 <sup>***</sup>    | –                     |

---

*Note.* LC = lack of controllability; PF = preparing for the future; EW = expecting the worst; SC = searching for causes and meanings; DP = dwelling on the past; TD = thoughts discrepant with the ideal self; Values not in parentheses refer to the factor loadings or correlations of males, whereas values in parentheses are the factor loadings or correlations of females. \*  $p < .05$ ; \*\*  $p < .01$ ; \*\*\*  $p < .001$ .

Table S8

Standardized factor loadings and correlations of Intolerance of Uncertainty Scale (IUS) items

across gender

| Item no. | IUS item                                                                   | IUS scales |           |
|----------|----------------------------------------------------------------------------|------------|-----------|
|          |                                                                            | SELF       | UNFAIR    |
| 12       | When it's time to act, uncertainty paralyzes me.                           | .78 (.79)  |           |
| 14       | When I am uncertain, I can't go forward.                                   | .82 (.77)  |           |
| 22       | Being uncertain means that I lack confidence.                              | .755 (.69) |           |
| 15       | When I am uncertain, I can't function very well.                           | .86 (.76)  |           |
| 13       | Being uncertain means that I am not first rate.                            | .82 (.76)  |           |
| 1        | Uncertainty stops me from having a strong opinion.                         | .58 (.47)  |           |
| 16       | Unlike me, others seem to know where they are going with their lives.      | .50 (.65)  |           |
| 17       | Uncertainty makes me vulnerable, unhappy, or sad.                          | .82 (.83)  |           |
| 2        | Being uncertain means that a person is disorganized.                       | .56 (.52)  |           |
| 20       | The smallest doubt can stop me from acting.                                | .77 (.74)  |           |
| 25       | I must get away from all uncertain situations.                             | .82 (.75)  |           |
| 9        | Uncertainty keeps me from living a full life.                              | .81 (.77)  |           |
| 24       | Uncertainty keeps me from sleeping soundly.                                | .74 (.65)  |           |
| 23       | I think it's unfair that other people seem to be sure about their future.  | .57 (.61)  |           |
| 3        | Uncertainty makes life intolerable.                                        | .72 (.70)  |           |
| 10       | One should always look ahead so as to avoid surprises.                     |            | .53 (.69) |
| 18       | I always want to know what the future has in store for me.                 |            | .68 (.66) |
| 5        | My mind can't be relaxed if I don't know what will happen tomorrow.        |            | .81 (.75) |
| 19       | I can't stand being taken by surprise.                                     |            | .70 (.66) |
| 21       | I should be able to organize everything in advance.                        |            | .72 (.66) |
| 8        | It frustrates me not having all the information I need.                    |            | .79 (.67) |
| 7        | Unforeseen events upset me greatly.                                        |            | .80 (.80) |
| 11       | A small unforeseen event can spoil everything even with the best planning. |            | .69 (.71) |
| 4        | It's unfair having no guarantees in life.                                  |            | .78 (.64) |
| 6        | Uncertainty makes me uneasy, anxious, or stressed.                         |            | .78 (.77) |
| 26       | The ambiguities in life stress me.                                         |            | .86 (.82) |
| 27       | I can't stand being undecided about my future.                             |            | .78 (.72) |

---

|           | 1                  | 2                     |
|-----------|--------------------|-----------------------|
| 1. SELF   | –                  | (.92 <sup>***</sup> ) |
| 2. UNFAIR | .88 <sup>***</sup> | –                     |

---

*Note.* SELF = uncertainty has negative behavioral and self-referent implications; UNFAIR = uncertainty is unfair and spoils everything; Values not in parentheses refer to the factor loadings or correlations of males, whereas values in parentheses are the factor loadings or correlations of females. \*  $p < .05$ ; \*\*  $p < .01$ ; \*\*\*  $p < .001$ .

Table S9

Standardized factor loadings and correlations of Anxiety Sensitivity Index–3 (ASI-3) across gender

| Item no. | ASI-3 item                                                                                       | ASI-3 Scales |              |              |
|----------|--------------------------------------------------------------------------------------------------|--------------|--------------|--------------|
|          |                                                                                                  | PHY          | COG          | SOC          |
| 3        | It scares me when my heart beats rapidly.                                                        | .85 (.80)    |              |              |
| 4        | When my stomach is upset, I worry that I might be seriously ill.                                 | .65 (.71)    |              |              |
| 7        | When my chest feels tight, I get scared that I won't be able to breathe properly.                | .82 (.77)    |              |              |
| 8        | When I feel pain in my chest, I worry that I'm going to have a heart attack.                     | .78 (.78)    |              |              |
| 12       | When I notice my heart skipping a beat, I worry that there is something seriously wrong with me. | .88 (.82)    |              |              |
| 15       | When my throat feels tight, I worry that I could choke to death.                                 | .67 (.73)    |              |              |
| 2        | When I cannot keep my mind on a task, I worry that I might be going crazy.                       |              | .77<br>(.73) |              |
| 5        | It scares me when I am unable to keep my mind on a task.                                         |              | .79<br>(.73) |              |
| 10       | When I feel "spacey" or spaced out I worry that I may be mentally ill.                           |              | .82<br>(.79) |              |
| 14       | When my thoughts seem to speed up, I worry that I might be going crazy.                          |              | .83<br>(.83) |              |
| 16       | When I have trouble thinking clearly, I worry that there is something wrong with me.             |              | .79<br>(.81) |              |
| 18       | When my mind goes blank, I worry there is something terribly wrong with me.                      |              | .67<br>(.80) |              |
| 1        | It is important for me not to appear nervous.                                                    |              |              | .59<br>(.53) |
| 6        | When I tremble in the presence of others, I fear what people might think of me.                  |              |              | .87<br>(.70) |
| 9        | I worry that other people will notice my anxiety.                                                |              |              | .83<br>(.81) |
| 11       | It scares me when I blush in front of people.                                                    |              |              | .81<br>(.58) |
| 13       | When I begin to sweat in a social situation, I fear people will think negatively of me.          |              |              | .71<br>(.77) |
| 17       | I think it would be horrible for me to faint in public.                                          |              |              | .55<br>(.64) |

---

|        | 1                  | 2                     | 3                     |
|--------|--------------------|-----------------------|-----------------------|
| 1. PHY | –                  | (.85 <sup>***</sup> ) | (.75 <sup>***</sup> ) |
| 2. COG | .82 <sup>***</sup> | –                     | (.78 <sup>***</sup> ) |
| 3. SOC | .70 <sup>***</sup> | .82 <sup>***</sup>    | –                     |

---

*Note.* PHY = physical concerns; COG = cognitive concerns; SOC = social concerns.; Values not in parentheses refer to the factor loadings or correlations of the males, whereas values in parentheses are the factor loadings or correlations of females. \*  $p < .05$ ; \*\*  $p < .01$ ; \*\*\*  $p < .001$ .

Table S10

Standardized factor loadings and correlations of Cognitive and Behavioral Processes

Questionnaire (CBPQ) items across gender

| Item no. | CBPQ item                                                                                                                                               | CBPQ scales |           |
|----------|---------------------------------------------------------------------------------------------------------------------------------------------------------|-------------|-----------|
|          |                                                                                                                                                         | Factor A    | Factor B  |
| A1       | How much have you focused on your internal experiences when feeling bad, rather than focusing on what is happening in your surroundings?                | .46 (.57)   |           |
| A2       | How much have you tried to mentally avoid or get rid of unpleasant internal experiences, rather than just noticing them and letting them pass?          | .60 (.60)   |           |
| A3       | How much have you tried to change or mentally control your internal experiences when feeling bad, rather than just noticing them and letting them pass? | .64 (.53)   |           |
| A4       | How much have you gone over and over past experiences when feeling bad, rather than doing the things that are important to you?                         | .80 (.77)   |           |
| A5       | How much have you worried about bad things that might happen in the future, rather than doing the things that are important to you?                     | .66 (.75)   |           |
| A6       | How much have you judged yourself or your appearance to other people when feeling bad, rather than just noticing people around you?                     | .68 (.65)   |           |
| A7       | How much have you let your internal experiences rather than what you see and hear in the moment, guide what you do?                                     | .57 (.71)   |           |
| A8       | How much have you analyzed past events for answers when feeling bad, rather than doing the things that are important to you?                            | .78 (.76)   |           |
| B1       | How much have you looked for possible harm or threats in your surroundings when feeling bad, rather than just noticing things around you?               |             | .64 (.51) |
| B2       | How much have you looked for things in your surroundings to make you feel safe when feeling bad, rather than just noticing things around you?           |             | .53 (.54) |
| B3       | How much have you avoided dealing with an actual problem when feeling bad, rather than doing something to solve the problem?                            |             | .66 (.67) |
| B4       | How much have you distracted yourself from feeling bad by doing an activity too often, rather than doing the things that are important to you?          |             | .66 (.74) |

|    |                                                                                                                                                      |           |
|----|------------------------------------------------------------------------------------------------------------------------------------------------------|-----------|
| B5 | How much have you been inactive or avoided situations, activities or people when feeling bad rather than doing the things that are important to you? | .74 (.75) |
| B6 | How much have you done something negative to stop yourself feeling bad, rather than just experienced feeling bad?                                    | .41 (.11) |
| B7 | How much have you used alcohol, drugs, food or an activity to reduce or prevent unpleasant internal experiences, rather than just “be with them”?    | .44 (.55) |

---

|             | 1                 | 2                     |
|-------------|-------------------|-----------------------|
| 1. Factor A | –                 | (.76 <sup>***</sup> ) |
| 2. Factor B | .91 <sup>**</sup> | –                     |

---

*Note.* Values not in parentheses refer to the factor loadings or correlation(s) of males, whereas values in parentheses are the factor loadings or correlation(s) of females. \*  $p < .05$ ; \*\*  $p < .01$ ; \*\*\*  $p < .001$ .
